# Supplementary material for: The effect of krill oil on Wnt/β-catenin signaling pathway in acetaminophen-induced acute liver injury in mice
Source: publisher site journal article supplement (doi:10.1515/tjb-2022-0289), 2023-05-26
Supplement: Supplementary file 1 [file j_tjb-2022-0289_suppl_001.docx]

**Supplementary Table 1.** Scores in liver histopathology according to experimental groups

| Groups | Degeneration | Necrosis | Kupffer cell activation | Hyperemia | Inflammatory  Cell infiltration |
| --- | --- | --- | --- | --- | --- |
| Control | -/+ | - | - | - | - |
| KO | -/+ | -/+ | -/+ | -/+ | - |
| APAP | ++/+++ | ++/+++ | ++/+++ | +/++ | -/+ |
| APAP+KO | +/++ | +/++ | + | -/+ | - |

(-): 0%-10%, (+): 10%-30% of total HPFs, (++): 30% - 70% of total HPFs, (+++): >70% of total HPFs (10 different high power fields). KO group: krill oil group; APAP group: acetaminophen group; APAP+KO: acetaminophen + krill oil group.
